# Supplementary material for: The impact of general practitioners working in or alongside emergency departments: a rapid realist review
Source: PubMed Central journal article supplement (PMC6500276; doi:10.1136/bmjopen-2018-024501), 2019-04-11
Supplement: bmjopen-2018-024501supp001.pdf [file bmjopen-2018-024501supp001.pdf]

## Supplementary file 1: Search Strategy for Medline (adapted for other databases)

1. exp Primary Health Care/
2. primary care.mp. [mp=title, abstract, original title, name of substance word, subject heading word, keyword heading word, protocol supplementary concept word, rare disease supplementary concept word, unique identifier, synonyms]
3. exp Physicians, Family/
4. exp Physicians, Primary Care/
5. family physician\*.mp. [mp=title, abstract, original title, name of substance word, subject heading word, keyword heading word, protocol supplementary concept word, rare disease supplementary concept word, unique identifier, synonyms]
6. exp Family Practice/
7. family practic\*.mp. [mp=title, abstract, original title, name of substance word, subject heading word, keyword heading word, protocol supplementary concept word, rare disease supplementary concept word, unique identifier, synonyms]
8. GP.mp. [mp=title, abstract, original title, name of substance word, subject heading word, keyword heading word, protocol supplementary concept word, rare disease supplementary concept word, unique identifier, synonyms]
9. exp After-Hours Care/
10. (after-hours care or out of hours or out-of-hours or OOH).mp. [mp=title, abstract, original title, name of substance word, subject heading word, keyword heading word, protocol supplementary concept word, rare disease supplementary concept word, unique identifier, synonyms]
11. exp General Practitioners/
12. general practic\*.mp. [mp=title, abstract, original title, name of substance word, subject heading word, keyword heading word, protocol supplementary concept word, rare disease supplementary concept word, unique identifier, synonyms]
13. 1 or 2 or 3 or 4 or 5 or 6 or 7 or 8 or 9 or 10 or 11 or 12
14. exp Emergency Medical Services/
15. exp Emergency Service, Hospital/
16. emergency department\*.mp. [mp=title, abstract, original title, name of substance word, subject heading word, keyword heading word, protocol supplementary concept word, rare disease supplementary concept word, unique identifier, synonyms]
17. (accident and emergenc\*).mp. [mp=title, abstract, original title, name of substance word, subject heading word, keyword heading word, protocol supplementary concept word, rare disease supplementary concept word, unique identifier, synonyms]
18. casual\*.mp. [mp=title, abstract, original title, name of substance word, subject heading word, keyword heading word, protocol supplementary concept word, rare disease supplementary concept word, unique identifier, synonyms]

19. emergency room.mp. [mp=title, abstract, original title, name of substance word, subject heading word, keyword heading word, protocol supplementary concept word, rare disease supplementary concept word, unique identifier, synonyms]
20. A&E.mp. [mp=title, abstract, original title, name of substance word, subject heading word, keyword heading word, protocol supplementary concept word, rare disease supplementary concept word, unique identifier, synonyms]
21. urgent care centre\*.mp. [mp=title, abstract, original title, name of substance word, subject heading word, keyword heading word, protocol supplementary concept word, rare disease supplementary concept word, unique identifier, synonyms]
22. (walkin or walk in or walk-in).mp. [mp=title, abstract, original title, name of substance word, subject heading word, keyword heading word, protocol supplementary concept word, rare disease supplementary concept word, unique identifier, synonyms]
23. 14 or 15 or 16 or 17 or 18 or 19 or 20 or 21 or 22
24. 13 and 23
25. limit 24 to yr="2015 -Current"

## Supplementary file 2: Articles that contributed data to theory development (listed chronologically by Country)

| Lead author    | Country | Title                                                                                                                                                                              | Study Design                                                                                                                                        |
|----------------|---------|------------------------------------------------------------------------------------------------------------------------------------------------------------------------------------|-----------------------------------------------------------------------------------------------------------------------------------------------------|
| Ablard 2017    | UK      | Primary care services co-located with Emergency Departments across a UK region: early views on their development                                                                   | Survey and semi-structured interviews                                                                                                               |
| Bentley 2017   | UK      | Emergency Department redirection to primary care: a prospective evaluation of practice                                                                                             | Prospective evaluation of the subsequent management and outcome of redirected non-urgent patients from a Scottish ED over 2 months                  |
| Dale 2017      | UK      | Extended training to prepare GPs for future workforce needs: a qualitative investigation of a one-year fellowship in urgent care                                                   | Qualitative investigation of a one-year fellowship in urgent care                                                                                   |
| Tammes 2016    | UK      | Exploring the relationship between general practice characteristics, and attendance at walk-in centres, minor injuries units and EDs in England 2012/2013: a cross-sectional study | Cross-sectional observational large data analysed using multivariable regression models                                                             |
| Proctor 2016   | UK      | A&E Avoidance schemes across London: A rapid review of good practice examples                                                                                                      | NHS report - 2 case studies involving redirection of non-urgent patients from the ED                                                                |
| Smith 2016     | UK      | To GP or not TO GP: Evaluation of children triaged to see a GP in a tertiary paediatric emergency department                                                                       | Retrospective cohort study of children classified as 'GP appropriate' seen by a GP between 14:00 and 22:00 and seen by ED staff outside these hours |
| Gnani 2016     | UK      | Healthcare use among preschool children attending GP-led urgent care centres: a descriptive observational study                                                                    | Retrospective observational study using routinely collected data                                                                                    |
| O'Cathain 2016 | UK      | Variation in avoidable emergency admissions: multiple case studies of emergency and urgent care systems                                                                            | Ethnographic residual analysis. Interviews with members of emergency care teams at 6 case study sites                                               |

|                 |    |                                                                                                                                                             |                                                                                                                                                                 |
|-----------------|----|-------------------------------------------------------------------------------------------------------------------------------------------------------------|-----------------------------------------------------------------------------------------------------------------------------------------------------------------|
| Begum 2016      | UK | Solving the A&E crisis using GP lead triage and redirection                                                                                                 | Poster - Patient questionnaire of 150 patients over 5 weeks redirected back to the GP for treatment with an appointment made on the same day                    |
| Gritz 2016      | UK | More under fives now seen in urgent care centre than A&E should we shift our focus                                                                          | Observational - retrospective analysis of routine operational data for attendances                                                                              |
| Greenfield 2016 | UK | Staff perceptions on patient motives for attending GP-led urgent care centres in London: a qualitative study                                                | Semi-structured interviews                                                                                                                                      |
| Cowling 2015    | UK | Referral outcomes of attendances at general practitioner-led urgent care centres in London, England: retrospective analysis of hospital administrative data | Retrospective analysis of administrative data recorded at a London urgent care centre of 243042 attendances from October 2009 to December 2012                  |
| Morton 2016     | UK | Describing team development within a novel GP-led urgent care centre model: a qualitative study                                                             | Staff semi-structured interviews at 2 GP-led urgent care centres in 2 London academic teaching hospitals                                                        |
| Arain 2015a     | UK | Perceptions of healthcare professionals and managers regarding the effectiveness of GP-led walk-in centres in the UK                                        | Qualitative using a phenomenological approach using semi structured interviews                                                                                  |
| Arain 2015b     | UK | Impact of a GP-led walk-in centre on NHS emergency departments                                                                                              | Patient survey over a 3-week period and analysis of attendances at the local children's hospital and minor injuries unit a year before and after the WIC opened |
| Johnson 2015    | UK | Evidence of primary care services at A&E                                                                                                                    | Letter (opinion piece) Provider of 4 UCC in London supporting co-located GPs services with emergency departments                                                |

|                    |    |                                                                                                                                                                                                      |                                                                                                                                                                                |
|--------------------|----|------------------------------------------------------------------------------------------------------------------------------------------------------------------------------------------------------|--------------------------------------------------------------------------------------------------------------------------------------------------------------------------------|
| NHS ECIST<br>2015  | UK | Primary care in emergency departments: a guide to good practice                                                                                                                                      | NHS policy document - Overview of factors to be considered when planning how best to use primary care clinicians in emergency departments, monitoring and refining the service |
| Harris 2014        | UK | How do clinicians with different training backgrounds manage walk-in patients in the ED setting?                                                                                                     | Retrospective case note review of a random sample of 384 patients that self-presented to the ED and were initially assessed by GPs or ED staff                                 |
| Thompson<br>2013   | UK | Suitability of emergency department attenders to be assessed in primary care: survey of general practitioner agreement in a random sample of triage records analysed in a service evaluation project | Four GPs independently used data extracted from 765 clinical notes to rate the appropriateness for management in primary care                                                  |
| Arain 2013         | UK | Patients' experience and satisfaction with GP led walk-in centres in the UK; a cross sectional study.                                                                                                | Patient survey over 3 weeks in 2 GP-led WICs                                                                                                                                   |
| Hunter 2013        | UK | A qualitative study of patient choices in using emergency health care for long-term conditions: The importance of candidacy and recursivity.                                                         | Questionnaire and semi-structured interviews                                                                                                                                   |
| Lengu 2012         | UK | Application of simulation and modelling in managing unplanned healthcare demand                                                                                                                      | Conference paper - Simulation and modelling to assess the impact of primary care clinicians deflecting patients with non-urgent needs away from A&E                            |
| Carson 2010        | UK | Primary care and emergency departments                                                                                                                                                               | Report based on results of a literature review, web-based survey and ED visits                                                                                                 |
| Clancy 2009        | UK | Launching a social enterprise see-and-treat service                                                                                                                                                  | Report outlining the service, number of patients seen and referred on in a 4-month period                                                                                      |
| Maheswaren<br>2009 | UK | Repeat attenders at national health service walk in centres                                                                                                                                          | Descriptive study using routine data from 4 walk-in centres in England                                                                                                         |

|                  |    |                                                                                                                                                      |                                                                                                                                                     |
|------------------|----|------------------------------------------------------------------------------------------------------------------------------------------------------|-----------------------------------------------------------------------------------------------------------------------------------------------------|
| Sandhu 2009      | UK | Emergency nurse practitioners and doctors consulting with patients in an emergency department: a comparison of communication skills and satisfaction | Observation study with a stratified sample of 296 video-taped consultations                                                                         |
| Dale 2008        | UK | The patient, the doctor and the emergency department: A cross-sectional study of patient-centeredness in 1990 and 2005                               | Observational study with a stratified sample of 430 video-taped consultations with data collection in May–July 1990 and May–July 2005.              |
| Salisbury 2007   | UK | The impact of co-located NHS walk-in centres on emergency departments                                                                                | Controlled before and after study                                                                                                                   |
| Chalder 2007     | UK | Comparing care at walk-in centres and at accident and emergency departments: an exploration of patient choice, preference and satisfaction           | A controlled, mixed-method study comparing 8 EDs with co-located WICs with the same number of “traditional” EDs.                                    |
| Pope 2005        | UK | What do other local providers think of NHS walk-in centres? Results of a postal survey                                                               | Postal survey                                                                                                                                       |
| Bickerton 2005   | UK | Streaming A&E patients to walk-in centre services                                                                                                    | Analysis of all patients attending a London hospital over 24 hours for suitability for WIC treatment                                                |
| Chew-Graham 2004 | UK | A new role for the general practitioners? Reframing inappropriate attenders to inappropriate services                                                | Qualitative semi-structured staff interviews                                                                                                        |
| Hsu 2003         | UK | Effect of NHS walk-in centre on local primary healthcare services                                                                                    | Before and after observational study of consultation rate in 12 general practices after the implementation of a walk-in centre                      |
| Salisbury 2002   | UK | What is the role of walk-in centres in the NHS?                                                                                                      | Analysis of routinely collected data, questionnaire completed by managers followed by semi-structured interviews and site visits                    |
| Grant 2002       | UK | An observational study comparing quality of care in walk-in centres with general practice and NHS Direct using standardised patients                 | Observational study involving assessment of clinicians by standardised patients at 20 walk in centres, 20 general practices and 11 NHS direct sites |

|              |    |                                                                                                                                                |                                                                                                                                                                                                                |
|--------------|----|------------------------------------------------------------------------------------------------------------------------------------------------|----------------------------------------------------------------------------------------------------------------------------------------------------------------------------------------------------------------|
| Coleman 2001 | UK | Will alternative immediate care services reduce demands for non-urgent treatment at accident and emergency?                                    | Questionnaire survey and notes review of non-urgent patients to assess the suitability of management by an alternative care service                                                                            |
| McGugan 2000 | UK | Primary care or A&E?                                                                                                                           | Prospective study over 2 months of a redirection policy                                                                                                                                                        |
| Rajpar 2000  | UK | Study of choice between accident and emergency departments and general practice centres for out of hours primary care problems                 | Interview of patients attending A&E and GP out-of-hours                                                                                                                                                        |
| Freeman 1999 | UK | Primary care units in A and E departments in North Thames in the 1990s: Initial experience and future implications                             | Postal questionnaire to ED staff and local GPs with follow up staff interviews                                                                                                                                 |
| Dale 1998    | UK | Primary care in accident and emergency departments: the cost effectiveness and applicability of a new model of care                            | PhD thesis – Includes data for included papers and additional analysis of 163 video-taped consultations                                                                                                        |
| Ward 1996    | UK | Primary care in London: an evaluation of general practitioners working in an inner-city accident and emergency department                      | Prospective survey over 6 weeks                                                                                                                                                                                |
| Dale 1996    | UK | Cost effectiveness of treating primary care patients in accident and emergency: a comparison between GPs, senior house officers and registrars | Prospective intervention study which was retrospectively costed                                                                                                                                                |
| Dale 1995a   | UK | Primary care in the accident and emergency department I: Prospective identification of patients                                                | 1 year prospective study at a London ED to compare patient characteristics and consultation activities for attenders assessed by nurse triage to have 'primary care' or 'accident and emergency' type problems |
| Dale 1995b   | UK | Primary care in the accident and emergency department: II. Comparison of general practitioners and hospital doctors                            | 1 year prospective study at a London ED to compare patient characteristics and consultation activities for attenders assessed by nurse triage to have 'primary care' or 'accident and emergency' type problems |

|                         |             |                                                                                                                                                                    |                                                                                                                                                                                                                                        |
|-------------------------|-------------|--------------------------------------------------------------------------------------------------------------------------------------------------------------------|----------------------------------------------------------------------------------------------------------------------------------------------------------------------------------------------------------------------------------------|
| O'Kelly 2010            | Ireland     | Impact of a GP cooperative on lower acuity emergency department attendances                                                                                        | A retrospective review of all attendances at the 'Dubdoc' service was compared with attendances at the ED for triage categories 4 and 5 of the same hospital over a 9-year period                                                      |
| Murphy 2000             | Ireland     | Effect of patients seeing a general practitioner in accident and emergency on their subsequent attendance: cohort study                                            | Analysis of reattendance of non-urgent patients that had been allocated to general practitioners or usual accident and emergency staff depending on time of registration                                                               |
| Gibney 1999             | Ireland     | Randomized controlled trial of general practitioner versus usual medical care in a suburban accident and emergency department using an informal triage system      | Patients 'randomised' at time of registration to either GP or ED care. Case note review                                                                                                                                                |
| Murphy 1996             | Ireland     | Randomised controlled trial of general practitioner versus usual medical care in an urban accident and emergency department: process, outcome and comparative cost | Randomised controlled trial of care provided by general practitioners to non-emergency patients in an accident and emergency department differs significantly from care by usual emergency staff in terms of process, outcome and cost |
| van Veelen 2016         | Netherlands | Effects of a general practitioner cooperative co-located with an emergency department on patient throughput                                                        | Pre-post comparison before and after implementation of a GP cooperative at an ED                                                                                                                                                       |
| Schols 2016             | Netherlands | Access to diagnostic tests during GP out-of-hours care: A cross sectional study of all GP out-hours services in the Netherlands                                    | Cross-sectional survey of all 117 GP out of hours services in the Netherlands                                                                                                                                                          |
| Van-Gils-van Rooij 2016 | Netherlands | Is patient flow more efficient in urgent care collaborations?                                                                                                      | Observational study, compared usual care with UCCs (single point of access for ED and GP OOH)                                                                                                                                          |



|                         |             |                                                                                                                                                             |                                                                                                                                                                    |
|-------------------------|-------------|-------------------------------------------------------------------------------------------------------------------------------------------------------------|--------------------------------------------------------------------------------------------------------------------------------------------------------------------|
| van Gils-van Rooij 2015 | Netherlands | Out-of-Hours Care Collaboration between General Practitioners and Hospital Emergency Departments in the Netherlands                                         | Observational study - comparing attendance and patient characteristics between EDs with standard care and EDs with co-located primary care and single joint triage |
| Thijssen 2013           | Netherlands | The impact on emergency department utilization and patient flows after integrating with a general practitioner cooperative: an observational study          | Observational study - routinely collected data over 6 years                                                                                                        |
| Huibers 2013            | Netherlands | GP cooperative and emergency department: an exploration of patient flows                                                                                    | Retrospective record review of patients who had visited GPC or ED                                                                                                  |
| Van der Straten 2012    | Netherlands | Safety and efficiency of triaging low urgent self-referred patients to a general practitioner at an acute care post: an observational study                 | Prospective observational study                                                                                                                                    |
| Bosmans 2012            | Netherlands | Addition of a general practitioner to the accident and emergency department: a cost-effective innovation in emergency care                                  | Observational study before and after implementation of new service                                                                                                 |
| Van Veen 2012           | Netherlands | Van Veen referral of non-urgent children from the emergency department to general practice: compliance and cost savings                                     | Prospective observational before after study                                                                                                                       |
| Van Veen 2011           | Netherlands | Safety of the Manchester Triage System to identify less urgent patients in paediatric emergency care: a prospective observational study                     | Analysis of the hospitalisation rate of self referred children triaged as non-urgent                                                                               |
| Boeke 2010              | Netherlands | Effectiveness of GPs in accident and emergency departments                                                                                                  | Observational study before and after implementation of new service                                                                                                 |
| Kool 2008               | Netherlands | Towards integration of general practitioner posts and accident and emergency departments: a case study of two integrated emergency posts in the Netherlands | Observational study comparing contacts, patient satisfaction and staff satisfaction pre-and post set up of a 2 co-located GP OOHs and 2 control sites              |

|                    |             |                                                                                                                                                                                 |                                                                                                                                                                      |
|--------------------|-------------|---------------------------------------------------------------------------------------------------------------------------------------------------------------------------------|----------------------------------------------------------------------------------------------------------------------------------------------------------------------|
| Giesen 2006        | Netherlands | Patients either contacting a general practice cooperative or accident and emergency department out of hours: a comparison                                                       | Retrospective record review                                                                                                                                          |
| Van Uden 2006      | Netherlands | Out-of-hours primary care. Implications of organisation on costs                                                                                                                | Annual reports of 2 GP co-operatives (1 co-located, 1 separate) analysed together with ED costs                                                                      |
| Van Uden 2005      | Netherlands | The Impact of a Primary Care Physician Cooperative on the Caseload of an Emergency Department: The Maastricht Integrated Out-of-Hours Service                                   | Observational study, patient characteristics collected for 3 weeks in Jan/Fen 1998 and March 2001 (co-operative set up in 2000)                                      |
| Van Uden 2004      | Netherlands | Does setting up out of hours primary care cooperatives outside a hospital reduce demand for emergency care?                                                                     | Before and after observational study                                                                                                                                 |
| Van Uden 2003      | Netherlands | Use of out of hours services: a comparison between two organisations                                                                                                            | Observational study of patient contacts at 2 different OOH centres and their associated EDs (1 co-located, 1 not)                                                    |
| Colliers 2017      | Belgium     | Implementation of a general practitioner cooperative adjacent to the emergency department of a hospital increases the caseload for the GPC but not for the emergency department | Quasi-experimental study analysing the implementation of 2 out of hours general practitioner co-operatives one adjacent to the ED, the other not and 2 control sites |
| Van den Heede 2016 | Belgium     | The 2016 proposal for the reorganisation of urgent care provision in Belgium: A political struggle to co-locate primary care providers and emergency departments                | Outline of the 2016 political proposal for the reorganisation of urgent care provision toned down due to GP opposition                                               |
| Ellbrant 2015      | Sweden      | Paediatric emergency department management benefits from appropriate early redirection of non-urgent visits                                                                     | Prospective observational study using ED records and case notes                                                                                                      |
| Krakau 1999        | Sweden      | Provision for clinic patients in the ED produces more nonemergency visits                                                                                                       | Before and after observational study                                                                                                                                 |

|                 |             |                                                                                                                                                        |                                                                                                                                                        |
|-----------------|-------------|--------------------------------------------------------------------------------------------------------------------------------------------------------|--------------------------------------------------------------------------------------------------------------------------------------------------------|
| Hansagi 1987    | Sweden      | Trial of a method of reducing inappropriate demands on a hospital emergency department.                                                                | Prospective observational study of 454 patients classified as non-urgent by the ED and redirected to alternative care over a 3-month period            |
| Chmiel 2016     | Switzerland | Implementation of a hospital-integrated general practice – a successful way to reduce the burden of inappropriate emergency-department use             | Longitudinal observational study                                                                                                                       |
| Hess 2015       | Switzerland | Satisfaction of health professionals after implementation of a primary care hospital emergency centre in Switzerland: A prospective before-after study | Questionnaire study of job satisfaction before and after a new emergency care model was implemented in Switzerland                                     |
| Wang 2014       | Switzerland | Hospital integrated general practice: a promising way to manage walk in patients                                                                       | Pre and post comparison study before and after implementation of a new hospital-integrated general practice model                                      |
| Chmiel 2011     | Switzerland | Walk-ins seeking treatment at an emergency department or general practitioner out-of-hours service: a cross-sectional comparison                       | Analysis of routinely collected data of 2974 patient encounters attending a GPC or ED                                                                  |
| Posocco 2017    | Italy       | Role of out of hours primary care service in limiting inappropriate access to emergency department                                                     | Retrospective analysis of 408 ED referrals from a local OOH service                                                                                    |
| Kork 2016       | Finland     | Improving access and managing healthcare demand with walk in clinic: convenient but at what cost?                                                      | Observational study over 48 months of the characteristics of 107 frequent attenders at a WIC from electronic patient records                           |
| Allen 2015      | Australia   | Low acuity and general practice type presentations to emergency departments: A rural perspective                                                       | Analysis of GP type presentations to 2 rural EDs over a 4-month period                                                                                 |
| Desborough 2013 | Australia   | Development and implementation of a nurse-led walk-in centre: evidence lost in translation?                                                            | Evaluation of the first 12 months of operation of the first Australian public nurse-led primary care walk-in centre compared to the English NHS model. |

|                 |           |                                                                                                                              |                                                                                                                                                                                   |
|-----------------|-----------|------------------------------------------------------------------------------------------------------------------------------|-----------------------------------------------------------------------------------------------------------------------------------------------------------------------------------|
| Nagree 2013     | Australia | Quantifying the proportion of general practice and low-acuity patients in the emergency department                           | Four methods for calculating general practice-type patients were compared for 3 tertiary EDs in Perth, Australia in 2009-2011                                                     |
| Sharma 2011     | Australia | Impact of co-located general practitioner (GP) clinics and patient choice on duration of wait in the emergency department    | Mathematical modelling of wait times using routine ED data                                                                                                                        |
| Richardson 2009 | Australia | Myths versus facts in emergency department overcrowding and hospital access block.                                           | Report referencing previous work                                                                                                                                                  |
| Bolton 2001     | Australia | The reasons for, and lessons learned from, the closure of the Canterbury GP After-Hours Service.                             | Report describing why a 12-month trial of GP staffed after hours service with an ED was not continued because the opportunity cost was greater than existing alternative services |
| Doran 2013      | USA       | An intervention connecting low acuity emergency department patients with primary care: Effect on future primary care linkage | Analysis of primary care follow up of patients presenting to ED assessed to have non-urgent problem and referred to an onsite primary care clinic                                 |
| Williams 1996   | USA       | The costs of visits to emergency departments.                                                                                | Analysis of emergency department charges and costs based on data from 6 community hospitals                                                                                       |
| Gadomski 1995   | USA       | Diverting managed care Medicaid patients from pediatric emergency department use.                                            | 6-month follow up of Medicaid children with non-emergent conditions not authorised to be seen in the Pediatric Emergency Department by their primary care provider                |
| Derlet 1995     | USA       | Prospective identification and triage of nonemergency patients out of an emergency department - 5 year study                 | 5 year study to analyse the outcome of adult patients refused care in the ED                                                                                                      |
| Derlet 1992     | USA       | Triage of patients out of the emergency department: three year experience.                                                   | 3 year study to analyse the outcome of adult patients refused care in the ED                                                                                                      |

|                   |             |                                                                                                                                                    |                                                                                                                                                                                    |
|-------------------|-------------|----------------------------------------------------------------------------------------------------------------------------------------------------|------------------------------------------------------------------------------------------------------------------------------------------------------------------------------------|
| Birnbaum 1994     | USA         | Failure to validate a predictive model for refusal of care to emergency-department patients.                                                       | Analysis of the outcome of 534 patients that met the pre-established criteria for refusal of care                                                                                  |
| Lowe 1994         | USA         | Refusing care to emergency department patients: evaluation of published triage guidelines.                                                         | Case note review of 106 patients who would have been refused care according to triage guidelines                                                                                   |
| Shaw 1990         | USA         | Indigent children who are denied care in the emergency department.                                                                                 | Six-month prospective study of 588 children denied care in the emergency department                                                                                                |
| Rivara 1986       | USA         | Pediatric nurse triage: its efficacy, safety and implications for care.                                                                            | Evaluation of emergency room triage of 748 children over a 6-week period at a large urban children's hospital that routinely referred outside of the institution for care          |
| Schull 2007       | Canada      | The Effect of Low-Complexity Patients on Emergency Department Waiting Times                                                                        | Analysis of 4.1 million patient visits over a 1 year period (2002-3) and 110 EDs of the effect of low-complexity patients on time of physician contact of high complexity patients |
| Vertesi 2004      | Canada      | Does the Canadian Emergency Department Triage and Acuity Scale identify non-urgent patients who can be triaged away from the emergency department? | Retrospective database audit in an urban referral hospital ED.                                                                                                                     |
| Hutchison 2003    | Canada      | Patient satisfaction and quality of care in walk-in clinics, family practices and emergency departments: the Ontario Walk-In Clinic Study.         | Prospective cohort study of the quality of care of 8 common acute conditions and patient satisfaction                                                                              |
| Anantharaman 2008 | Singapore   | Impact of health care system interventions on emergency department utilisation and overcrowding in Singapore                                       | Retrospective analysis of attendances at six main public EDs over 32 years                                                                                                         |
| Wilson 2005       | New Zealand | Co-locating primary care facilities within emergency departments: brilliant innovation or unwelcome intervention into clinical care?               | Report reviewing a proposal to co-locate a primary care facility within the local emergency department                                                                             |
